1           **Stress-responsive *Entamoeba* topoisomerase II: a**  
2                                   **potential anti-amoebic target**

3  
4   Sneha Susan Varghese, Sudip Kumar Ghosh \*

5   Department of Biotechnology, Indian Institute of Technology Kharagpur, Kharagpur, West  
6   Bengal, India 721 302.

7   \* Corresponding author

8   Email: [sudip@bt.iitkgp.ac.in](mailto:sudip@bt.iitkgp.ac.in) (SKG)

9

10   **Author contributions**

11   SSV and SKG: designed research, SSV: performed experiments, SSV and SKG: wrote the paper.

12

13   **Conflict of Interest**

14   The authors declare that there are no conflicts of interest

15

16   **Key Words:** *Entamoeba*; protozoan parasite; topoisomerase; anti-amoebic; drug-target;

17   *Entamoeba invadens*.

18

19 **Abstract**

20 Topoisomerases are ubiquitous enzymes, involved in all DNA processes across the biological  
21 world. These enzymes are also targets for various anticancer and antimicrobial agents. The  
22 causative organism of amoebiasis, *Entamoeba histolytica* (*Eh*), has seven unexplored genes  
23 annotated as putative topoisomerases. One of the seven topoisomerases in this parasite was found  
24 to be highly up-regulated during heat shock and oxidative stress. The bioinformatic analysis  
25 shows that it is a eukaryotic type IIA topoisomerase. Its ortholog was also highly up-regulated  
26 during the late hours of encystation in *E. invadens* (*Ei*), the encystation model of *Eh*.  
27 Immunoprecipitated endogenous EhTopoII showed topoisomerase II activity *in vitro*.  
28 Immunolocalization studies show that this enzyme colocalized with newly forming nuclei during  
29 encystation, which is a significant event in maturing cysts. Double-stranded RNA mediated  
30 down-regulation of the TopoII both in *Eh* and *Ei* reduced the viability of actively growing  
31 trophozoites and also reduced the encystation efficiency in *Ei*. Drugs, targeting eukaryotic  
32 topoisomerase II, e.g., etoposide, ICRF193, and amsacrine, show 3-5 times higher EC<sub>50</sub> in *Eh*  
33 than that of mammalian cells. Sequence comparison with human TopoII $\alpha$  showed that key amino  
34 acid residues involved in the interactions with etoposide and ICRF193 are different in  
35 *Entamoeba* TopoII. Interestingly, ciprofloxacin an inhibitor of prokaryotic DNA gyrase showed  
36 about six times less EC<sub>50</sub> value in *Eh* than that of human cells. The parasite's notable  
37 susceptibility to prokaryotic topoisomerase drugs in comparison to human cells opens up the  
38 scope to study this invaluable enzyme in the light of an antiamoebic target.

39

40

41

- 42 **Abbreviations**
- 43 *Eh* *E. histolytica*
- 44 *Ei* *E. invadens*
- 45 **EhTopo II** *E. histolytica* topoisomerase II
- 46 **EiTopo II** *E. invadens* topoisomerase II
- 47 **SPO11** Meiotic recombination protein
- 48 **Topo** Topoisomerase

## 49 **Introduction**

50 Amoebiasis is a leading cause of death due to a parasitic protozoan infection worldwide, highly  
51 prevalent in regions with poor sanitation and hygiene. The causative organism, *Entamoeba*  
52 *histolytica*, alternates between two life stages- pathogenic trophozoite and resistant cyst stage [1].  
53 Stage conversion to the dormant form is called encystation and is the critical process for host-to-  
54 host transmission of the disease. Much of the information about encystation comes from studying  
55 the closely related reptilian parasite *E. invadens*, as it can encyst *in vitro* under reduced osmotic  
56 pressure and nutrient depletion [2, 3]. Hence, stress is a precursor for encystation, and this  
57 process witnesses the activation of several specific stress-responsive proteins and signaling  
58 pathways [4, 5]. One of the key features during this stage conversion is the appearance of four  
59 distinct nuclei during the later hours of encystation [6, 7]. Association of the sexual process, like  
60 meiosis, with encystation in *Entamoeba*, has been a point of debate for long. Low levels of  
61 allelic heterozygosities [8], evidence of homologous recombination [9], the presence of meiotic  
62 genes and their upregulation during encystation [10], and the formation and aggregation of  
63 haploid nuclei in multinucleated giant cells during encystation [11] indicate the occurrence of  
64 meiosis-like processes and homologous recombination during glucose deprived encystation.  
65 Across the biological world, all key DNA processes are associated with a group of ubiquitous  
66 enzymes called topoisomerases. These enzymes maintain DNA topology by creating breaks in  
67 the DNA and allowing strand passage. Thus, these are involved in removing DNA supercoils,  
68 chromosomal condensation, strand-breakage during recombination, and disentangling  
69 intertwined DNA, in naming a few [12, 13]. Based on their mode of action, there are two broad  
70 types of topoisomerase, viz Type I and Type II. The former function as monomers, creating  
71 single strand breaks while the latter forms multimers and introduces double-strand breaks in the

72 DNA. Owing to the vital functions of these enzymes, they have been extensively evaluated as  
73 targets for many antitumors, antibacterial, and antifungal drugs [14-17]. Also, topoisomerases in  
74 several pathogenic protozoans like *Plasmodium*, and *Leishmania* are being evaluated as targets  
75 for antiparasitic agents [18-21].

76 Treatment for amoebiasis relies primarily on nitroimidazole based drugs, especially  
77 metronidazole [22]. Although effective both in bowel lumen and tissue, this broad spectrum drug  
78 is reported to eradicate only 50% of luminal infection [23]. Successful induction of  
79 metronidazole-resistant parasitic strain at the laboratory level points to the probability of drug  
80 resistance in the near future [24, 25]. Moreover, the side effects of metronidazole include nausea,  
81 abdominal pain, diarrhea, and in severe cases, results in neurotoxicity, optic neuropathy,  
82 peripheral neuropathy, and encephalopathy [26, 27]. Hence, there is a need for newer and  
83 effective alternative solutions.

84 In this study, stress-responsive, eukaryotic Type IIA topoisomerase was identified in *Eh* and *Ei*,  
85 upregulated both at RNA as well as protein level during later stages of encystation, and various  
86 other stresses, like heat shock and oxidative stress. RNAi mediated silencing of that gene has  
87 shown a significant impact on the overall viability and encystation efficiency of *Entamoeba*.  
88 Further, a higher potency of prokaryotic topoisomerase II drugs on the parasite when compared  
89 to human cells makes it a significant drug target worth further exploration.

90

## 91 **2. Results**

### 92 **2.1. Phylogenetic classification of *Entamoeba* topoisomerase genes**

93 Topoisomerases are broadly categorized as type I and II, based on their structure and function.

94 Type I functions as a monomer, creating single strand breaks and based on differences in the  
95 mechanism of action, they are subcategorized as IA and IB. Prokaryotic topo I, all topo III and  
96 reverse gyrase belong to the former while latter comprises of eukaryotic topo I and archeal  
97 topoV. Although all type II topoisomerases are multimers and create double strand breaks, based  
98 on their structural differences, these are sub-classified as type IIA (eukaryotic topo II, topo IV  
99 and DNA gyrase) and type IIB (topo VI).

100 Phylogenetic analysis shows that all genes annotated as topoisomerases in *Entamoeba* are  
101 eukaryotic (Fig 1). Interestingly, orthologs of *Eh* and *Ei* were very closely related, and hence  
102 observations for one may be extrapolated to its ortholog. EHI\_073170/EIN\_344850 and  
103 EHI\_087330/EIN\_173080 showed a very distant relation with Topo VI, which is reported only  
104 in plants and archaeobacteria. From the remaining pool of five genes, EHI\_038920/EIN\_052260  
105 and EHI\_042880/EIN\_174490 shared maximum similarity with topoisomerase III $\alpha$  and III $\beta$   
106 (Type IA), respectively. Further, EHI\_125320/EIN\_371990 and EHI\_194510/EIN\_229710  
107 aligned closely with SPO11 family, which function similar to Topoisomerase II and creates  
108 double-strand breaks during meiosis. EHI\_120640/EIN\_145900 resembled eukaryotic  
109 Topoisomerase II $\alpha$  (Type IIA). Multiple sequence alignment and NCBI-CDD shows that the  
110 putative topoisomerase II is a dimer with three core domains: N-terminal ATPase domain, a  
111 central domain carrying the active site and a C-terminal variable domain carrying the NLS  
112 sequence (Fig 2). Interestingly, neither of the *Entamoeba* species had a recognizable eukaryotic  
113 topo I (Type IB).

114  
115  
116  
117  
118  
119  
120  
121

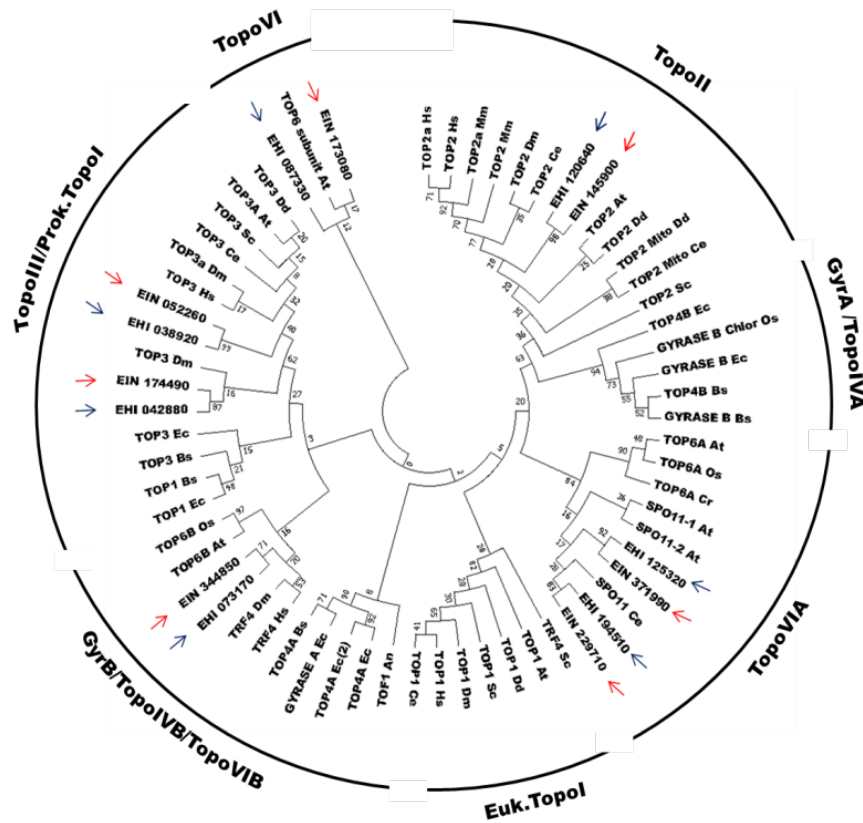

**Fig 1. The phylogenetic classification of *Entamoeba* topoisomerase genes.** Phylogenetic tree generated based on maximum likelihood method using MEGA 7.0 software. Different topoisomerases from various prokaryotic and eukaryotic organisms were used to construct the tree. The seven putative topoisomerases of *E. histolytica* and *E. invadens* is highlighted with blue and red arrows, respectively. **At:** *Arabidopsis thaliana*; **Bs:** *Bacillus subtilis*; **Ce:** *Caenorhabditis elegans*; **Cr:** *Chlamydomonas reinhardtii*; **Ds:** *Dictyostelium discoideum*; **Dm:** *Drosophila melanogaster*; **Ec:** *Escherichia coli*; **Hs:** *Homo sapien* **Mm:** *Mus musculus*; **Os:** *Oryza sativa*; **Sc:** *Saccharomyces cerevisiae*.

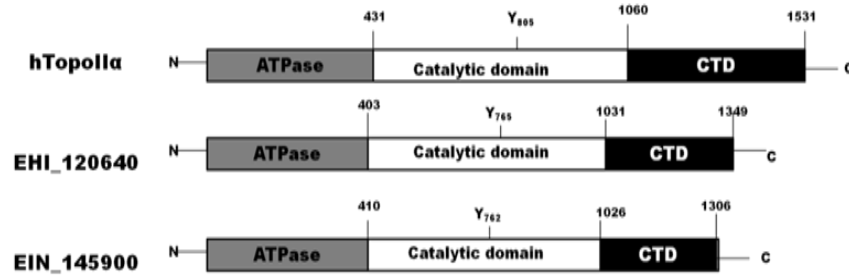

**Fig 2. Domain organization on putative Topo II of *Entamoeba*.** Comparison of predicted domains on putative topoisomerase II of *Eh* and *Ei* with the domains of human topoisomerase II $\alpha$ . The putative TopoII of *Entamoeba* has all the three crucial domains: N-terminal domain with ATPase activity, Central catalytic domain housing the active Tyr residue, and highly variable C-terminal domain that nestles the Nuclear Localization Sequence.

122 **2.2. Expression profile of putative *Entamoeba* Topoisomerase genes during different**  
 123 **stresses and encystation**

124 Real-time RT-PCR analysis of these five genes shows that only EHI\_120640 and its ortholog  
 125 EIN\_145900 were highly upregulated during heat shock and oxidative stress, although the gene  
 126 expression did not significantly alter during 16h of glucose starvation. As a similar upregulation  
 127 of EIN\_145900 gene expression was also observed during later periods of encystation, this could  
 128 be important for stress response in *Entamoeba* (Fig 3). Much like during 16h of glucose  
 129 starvation, early periods of encystation did not show upregulation of EIN\_145900. Similar  
 130 observations for all these genes during encystation were noted from the microarray data [28] (S1  
 131 Fig). As a result, further study focused on this stress responsive putative topoisomerase II.  
 132 EIN\_229710, predicted as SPO11 has already been reported to be a meiosis-specific gene and  
 133 upregulated during encystation of *E. invadens* [10].

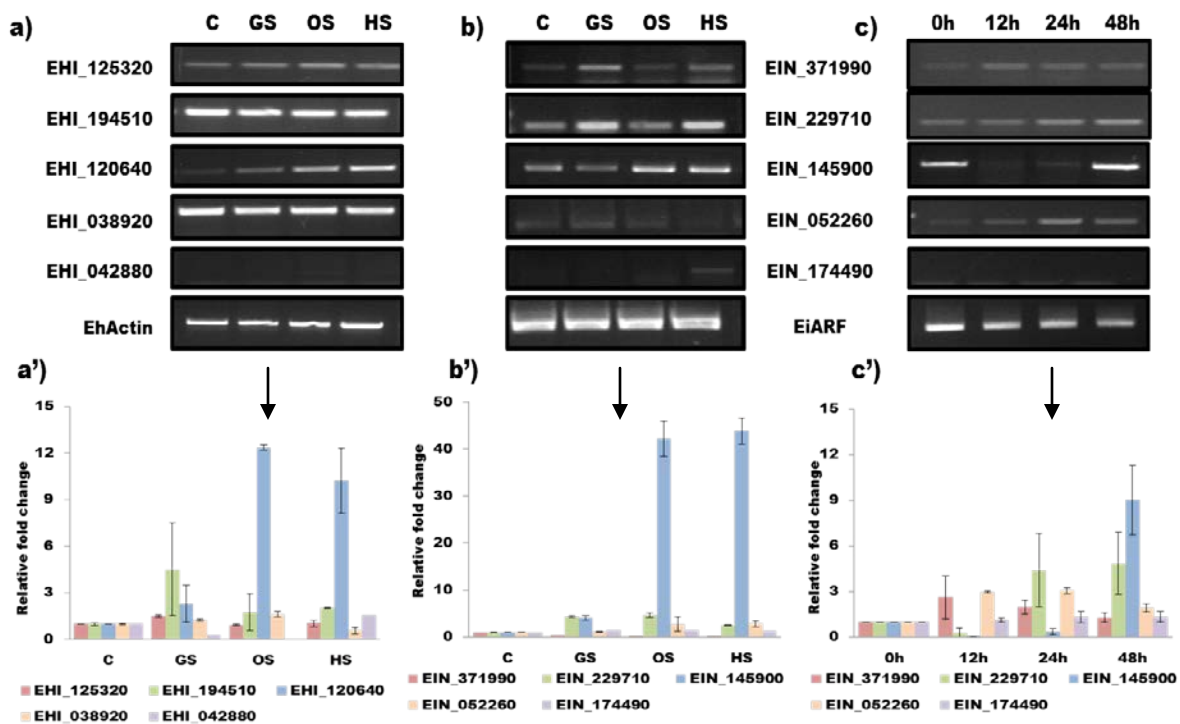

134

135 **Fig 3. Expression profile of putative *Entamoeba* Topoisomerase genes during different stresses and encystation.** sq-RT PCR and corresponding Real-time PCR analysis showing relative fold change in transcription of different putative topoisomerases under different stress conditions of a) *E. histolytica* and b) *E. invadens* and, c) *E. invadens* during different hours on encystation. EHI\_120640 and its ortholog, EIN\_145900 are markedly upregulated during various stress and later hours of encystation. C-Control; GS-Glucose starvation; OS- Oxidative stress; HS- Heat shock



136 **2.3. Cloning, expression, and purification of recombinant putative EhTopo II fragment**

137 Although different combinations of bacterial expression vector and strains were tried, full-length  
138 expression of putative EhTopo II (4050bp) was not successful. Hence a 1127bp fragment (from  
139 760bp-1887bp) was successfully cloned into pET21a expression vector, and recombinant  
140 EhTopo II fragment was successfully expressed with a 6x Histidine tag at the C-terminal in *E.*  
141 *coli* B121(DE3) strain using 1mM IPTG. The insoluble, recombinant protein so obtained was  
142 solubilized using 0.25% S-lauryl sarcosine, purified by Ni-NTA affinity chromatography and  
143 resolved by SDS-PAGE (S2 Fig). Purified recombinant EhTopo II fragment was used to raise  
144 antibody in rabbits. Anti-EhTopoII antibody was purified from crude sera and confirmed by  
145 Western blot analysis. As the antigenic fragment of EhTopo II shared 70% sequence similarity  
146 with its ortholog in *Ei*, the anti-EhTopo II antibody could successfully bind to EiTopo II as well  
147 (S3 Fig).

148 **2.4. Topoisomerase II protein expression is upregulated during different stresses and**  
149 **encystation in *Entamoeba***

150 Topoisomerase II protein was expressed under all the studied stress conditions in both *E.*  
151 *invadens* and *E. histolytica* with a marked upregulation during heat shock and oxidative stress  
152 (\* $p < 0.05$ , as compared to control) (Fig 4a and 4b). The temporal expression of the protein during  
153 encystation followed a pattern similar to the transcript profile wherein the protein expression  
154 gradually declined in the early hours and showed a drastic upregulation during the later stages,  
155 which is also the period of tetranuclei formation (Fig 4c). Hence this confirms *Entamoeba* Topo  
156 II is upregulated at both transcription and protein synthesis.

157

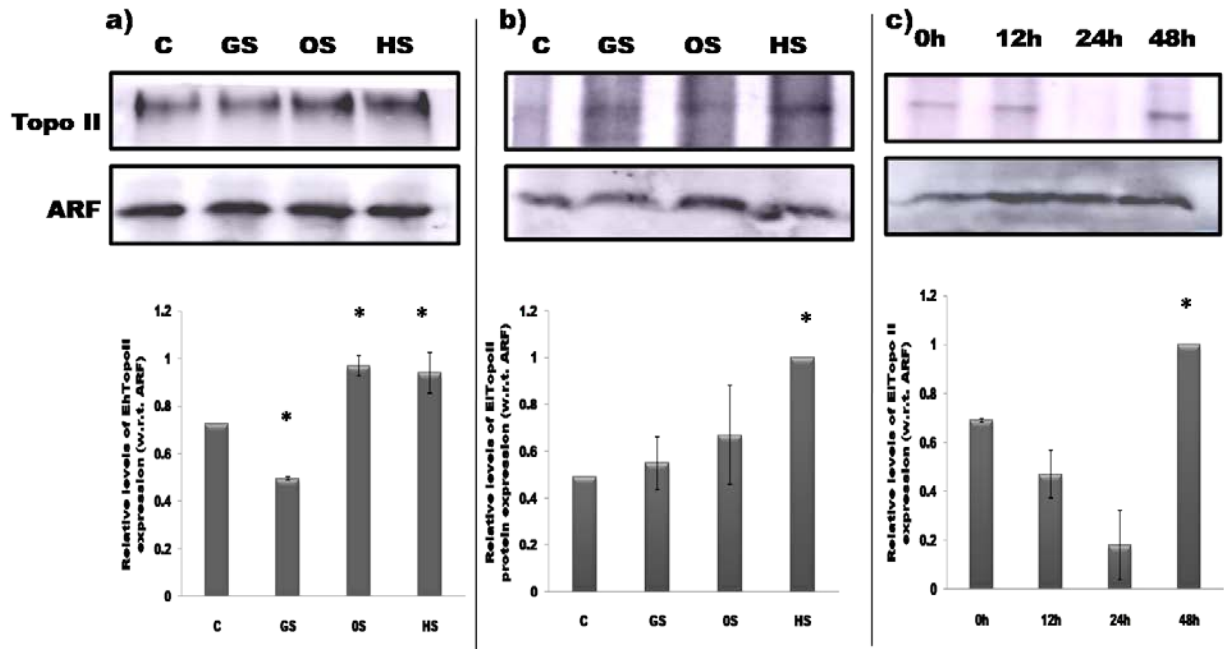

158

159

160

161

**Fig 4. Upregulation of Topoisomerase II protein expression during different stress and encystation in *Entamoeba*.** Western blot analysis for the expression profile of Topo II protein during different stresses in a) *E. histolytica*, b) *E. invadens* and c) during different hours of encystation in *E. invadens*, respectively. Similar findings as that of Real-time RT-PCR were observed. ARF was used internal control for normalisation. C- Untreated control; GS- Glucose starvation; OS- Oxidative stress; HS- Heat shock.

162

## 2.5. *Entamoeba* trophozoites express functional topoisomerase II

163

The function of topoisomerases is to relieve the topological strain that occurs in the DNA during

164

various processes like replication, transcription, chromosomal segregation, etc. This is achieved

165

by relaxing positive or negative supercoils in the DNA and depending on the type of enzyme,

166

various cofactors are required for this process. We have predicted the presence of eukaryotic

167

Topo III and Topo II in *Entamoeba*. TopoIII requires only MgCl<sub>2</sub> while Topo II requires both

168

ATP and MgCl<sub>2</sub> as cofactors for its enzymatic activity. To determine whether *Entamoeba*

169

trophozoites express functional topoisomerase II, we studied its ability to relax negative

170

supercoils. Varying concentration of nuclear extracts, prepared from actively proliferating

171

cultures, could successfully relax negatively supercoiled plasmids in the presence of co-factors

172

ATP and MgCl<sub>2</sub>. At 40µg of crude nuclear extract, *Eh* was able to relax 100% of the supercoiled

173 plasmid in comparison to 70-80% relaxation by *Ei* at the same concentration (Fig 5a and 5b).  
 174 This study shows the presence of active Topo II in *Entamoeba* trophozoites  
 175 Endogenous EhTopo II was immunoprecipitated from the crude nuclear extract using anti-  
 176 EhTopo II antibody. The native EhTopo II showed relaxation activity only in the presence of  
 177 both ATP and MgCl<sub>2</sub>. As no relaxation was observed in the absence of either ATP or MgCl<sub>2</sub> or  
 178 both, it can be concluded that the pulled down Topo II was not contaminated with any type I  
 179 topoisomerases (Fig 5c).

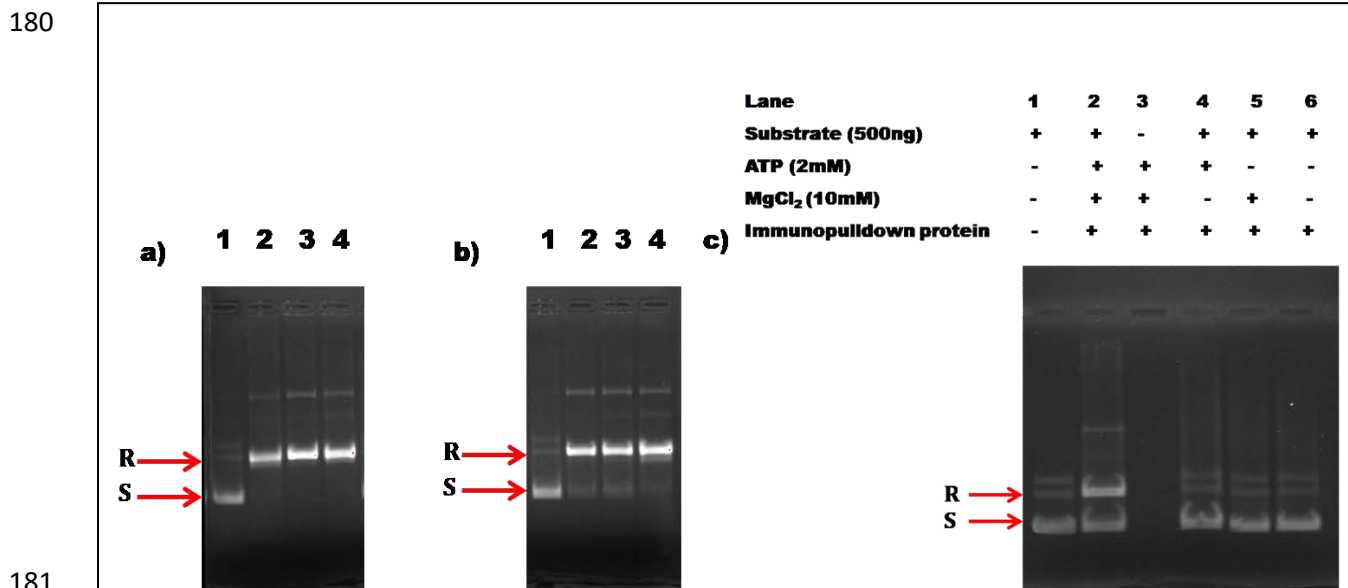

181  
 182 **Fig 5. *Entamoeba* trophozoites express functional topoisomerase II.** Agarose gel electrophoresis (1%)  
 183 depicting the relaxation of negatively supercoiled plasmids by varying amounts of crude nuclear (Lane 1-4  
 184 contains 0, 20µg, 40µg and 60µg of crude nuclear extract from the respective source) of a) *Eh* and b) *Ei*. c)  
 185 endogenous EhTopoII (immunoprecipitated from nuclear extracts of *Eh*, using anti-TopoII antibody).  
 Relaxation activity occurs only in the presence of both ATP and MgCl<sub>2</sub>. **R** and **S** represent the negatively  
 supercoiled plasmid and the relaxed form, respectively.

186 **2.6. Localization of Topoisomerase II on newly forming tetranuclei during encystation in**  
 187 ***Entamoeba***

188 Confocal micrograph analysis showed that Topo II localizes in the nucleus of *Eh* trophozoites  
 189 during normal growth as well as during oxidative stress and heat shock. Contrarily, during

190 glucose starvation, the protein was observed to move out into the cytoplasm (Fig 6a), and this  
191 observation during glucose starvation was consistent in *Ei* as well (Fig 6b). During the early  
192 hours of encystation (12 hours) *Ei*Topo II expression reduced in comparison to trophozoite. This  
193 observation is in consensus with real-time RT-PCR and western blot analysis. As topoisomerase  
194 II is a key player in cell growth and proliferation, degradation of the enzyme during glucose  
195 starvation and early encystation could be a part of the initial survival response of the organism to  
196 energy deficiency. However, with the progression of encystation into later hours,  
197 Topoisomerase II co-localized with the newly forming tetranuclei suggesting that this enzyme  
198 may be responsible for relieving the topological strains that occur in the DNA during this nuclear  
199 event (Fig 6c).

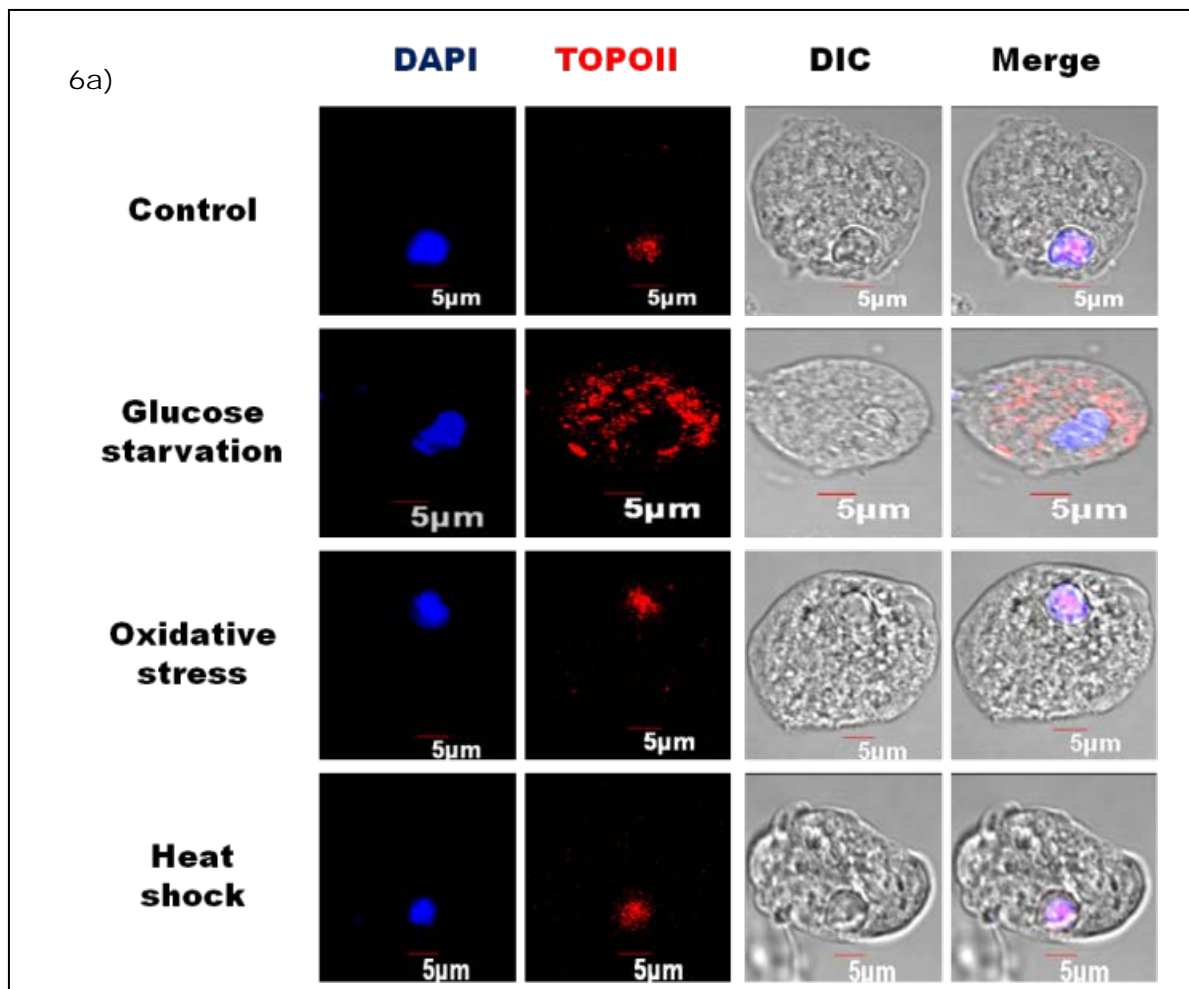

200

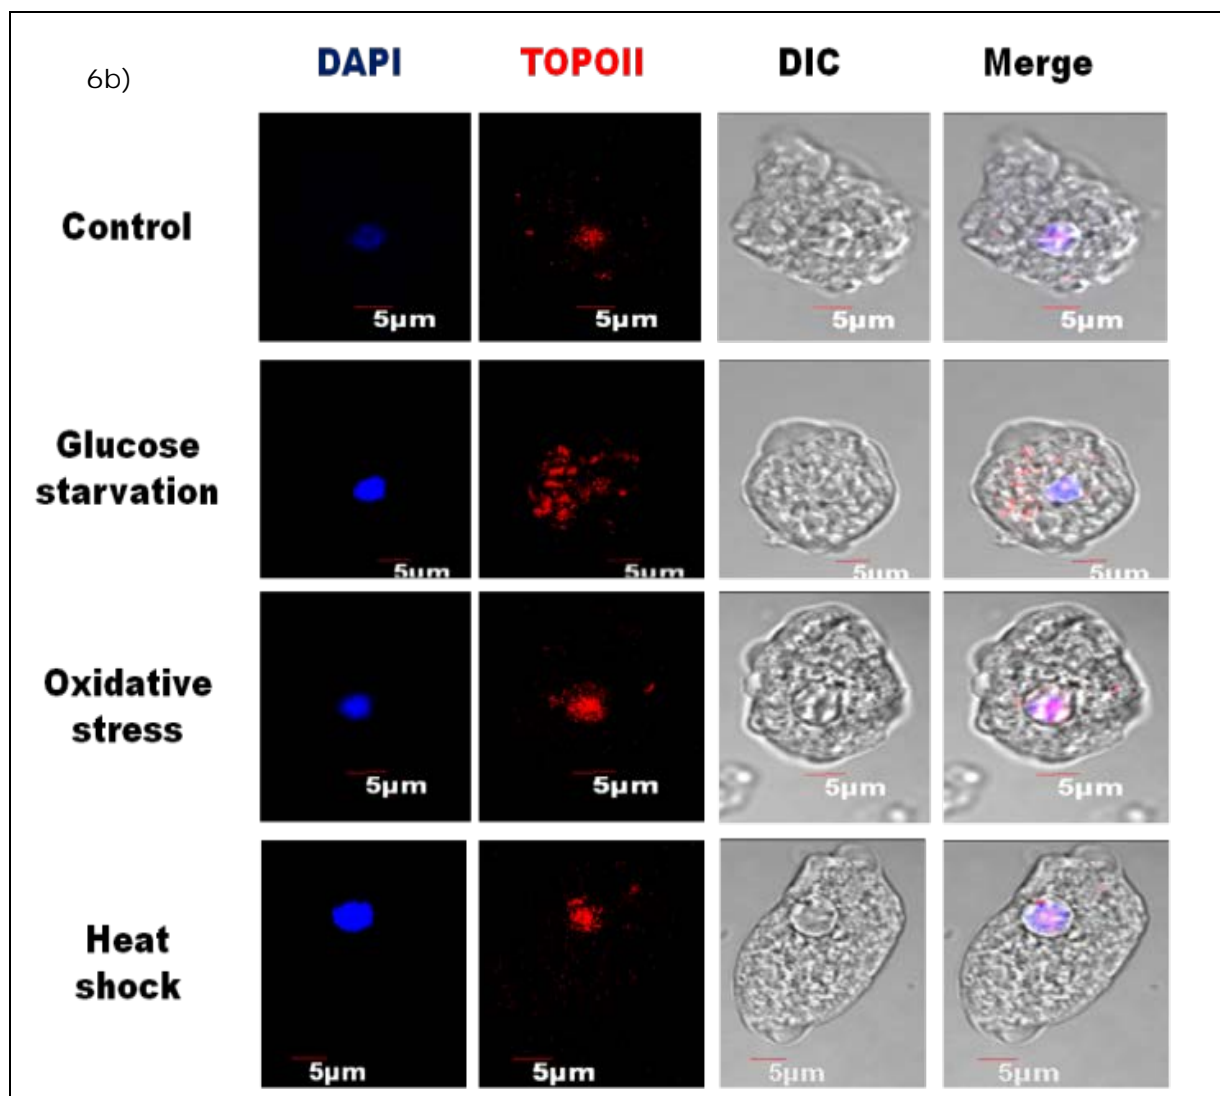

201

202

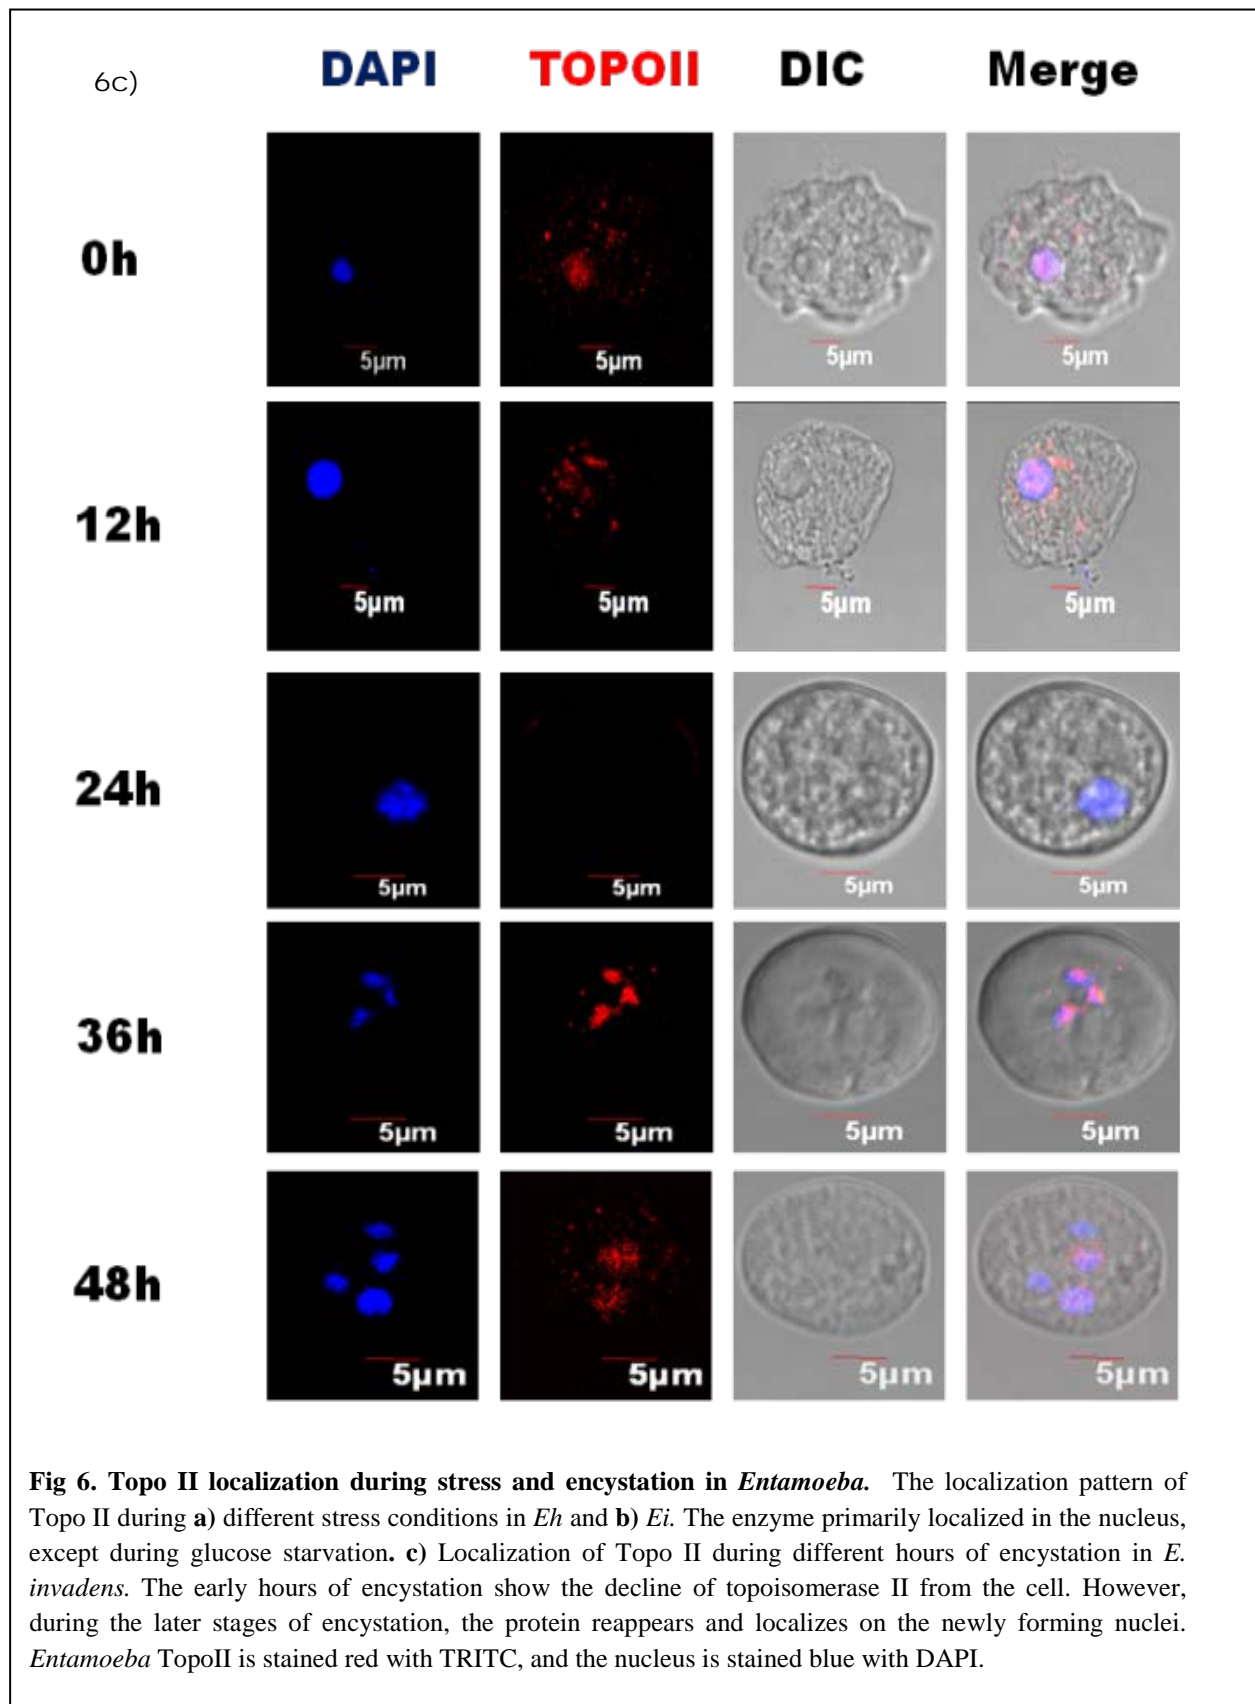

## 208 2.5. TopoII silencing in *Entamoeba* significantly affects the viability of trophozoite and cyst

209 To understand the *in vivo* role of *Entamoeba* TopoII during normal growth as well as  
210 encystation, we employed the dsRNA mediated silencing strategy reported by Samanta and  
211 Ghosh, 2012 [29]. Gene-specific dsRNA was cloned into the pL4440 vector which is flanked by  
212 T7 promoter on either side, expressed and purified from RNase III-deficient *E. coli* HT115 cells.  
213 Approximately, 60-70% reduction in the transcription of *Entamoeba Topo II* was observed in  
214 samples soaked with 200µg/mL gene-specific dsRNA in comparison to control (untreated) (S4  
215 Fig).

216 Topoisomerase is considered a proliferation marker and is an absolute requirement for rapidly  
217 proliferating eukaryotic cells. Interestingly, silencing of topoisomerase II in actively growing,  
218 log-phase trophozoites significantly (\*\*P<0.001) reduces the viability by about 25% and 30%  
219 in *Eh* and *Ei*, respectively (Fig 7a). A similar reduction in viability as well as encystation  
220 efficiency was observed upon silencing the gene in samples under encystation condition. The  
221 encystation efficiency and viability of *EiTopoII* silenced cells reduced by approximately 42%  
222 and 28% respectively in comparison to the two control conditions (Fig 7b and 7c).

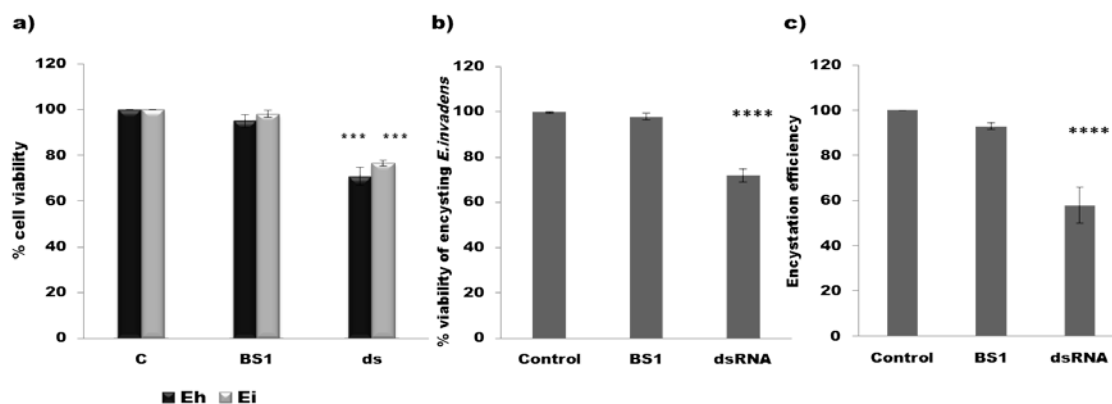

223 **Fig 7. TopoII silencing in *Entamoeba* significantly affects the viability of trophozoite and cyst.** a) The %  
224 viability of *Eh* and *Ei* trophozoites, on silencing the respective Topoisomerase II for 24h. A significant  
225 reduction of 30% and 25% (P<0.001) respectively, in the viability of actively growing trophozoites, were  
226 observed. b) Cell viability (%) and c) encystation efficiency of *Ei* after 48h of encystation during dsRNA  
mediated Topo II downregulation (200µg/ml). A significant reduction (P<0.0001) in the viability and  
encystation efficiency of about 30% and 42% respectively observed upon silencing *TopoII*

## 227 **2.6. Less toxicity of eukaryotic topoisomerase II inhibitors in *E. histolytica***

228 As topoisomerase II is an extensively studied class of enzyme and is essential for cell growth and  
229 proliferation, many drugs designed against the eukaryotic topoisomerase II are available as  
230 anticancer and antifungal agents. We tested the potency of three different kinds of eukaryotic  
231 Topoisomerase II inhibitors viz. etoposide, amsacrine, and ICRF-193 on *E. histolytica*. The  
232 former two stabilize the cleavable complex, prevent the religation of double-strand breaks and  
233 hence stimulate enzyme-mediated DNA breakage. ICRF 193, a bisdioxopiperazine, locks the  
234 enzyme in a closed-clamp and prevents ATP hydrolysis necessary to regenerate the active form  
235 of the enzyme. Etoposide, ICRF-193, and amsacrine were lethal against *E. histolytica* with  $EC_{50}$   
236 of 200 $\mu$ M, 15 $\mu$ M and, 80 $\mu$ M, respectively (Fig 8). However, the susceptibility of *Eh* to  
237 eukaryotic drugs is approximately 3-5 times lower than that of the human hosts, especially  
238 towards etoposide (Table 1).

239 Two crucial regions in hTopo II viz, PLRGKXLNVR (motif I) and Q/MXLMM (motif II) are  
240 reported to interact with etoposide [30]. Topo II aminoacid sequence alignment of different  
241 *Entamoeba* species with that of hTopo II $\alpha$  shows that the motif I is mostly conserved. The  
242 Q/MXLMM motif on hTopoII $\alpha$  interacts with etoposide primarily via the M<sub>762</sub> and M<sub>766</sub> residues.  
243 Mutation of these residues has shown to interfere with the etoposide binding property and  
244 increase resistance to this drug [31, 32]. The motif II is mostly conserved among different  
245 species of *Entamoeba*; however, it is different from the motif II in hTopoII $\alpha$ . The key drug  
246 interacting methionine residues are absent in all *Entamoeba* species and are naturally substituted  
247 with V<sub>723</sub> and A<sub>727</sub> in *E. histolytica* (Fig 9).

248 The drug binding pocket for bisdioxopiperazines like ICRF 193 comprises of 14 residues (7 from  
249 each monomer) in eukaryotic Topo II [33, 34]. The histidine residue in this pocket is replaced



250 with glutamine not only in the human parasite but in all other species of *Entamoeba* as well (Fig  
 251 10). Alterations in these residues could be the reason for low toxicity of eukaryotic Topo II drugs  
 252 on *E. histolytica*.

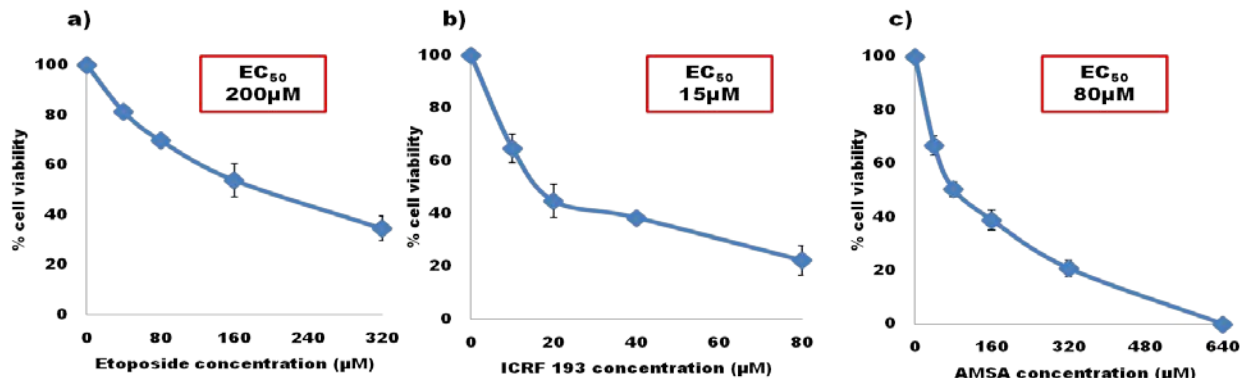

253 **Fig 8. Less toxicity of eukaryotic topoisomerase II inhibitors in *E. histolytica*.** Dose-dependent effect of  
 254 eukaryotic Topoisomerase II drugs, namely a) etoposide b) ICRF 193 and c) amsacrine (AMSA) on *E.*  
*histolytica* viability following 24h treatment.

255

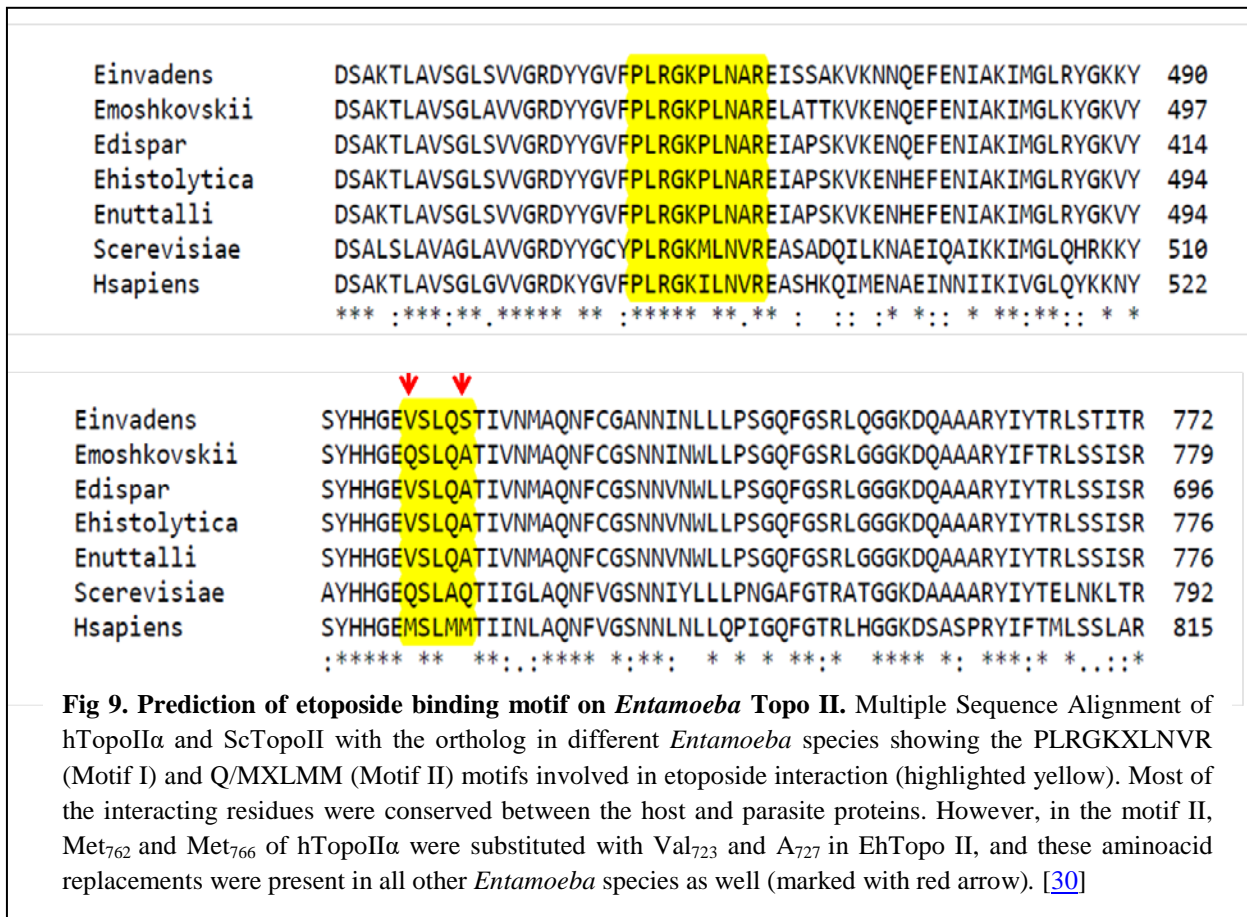

260

|              |                                                               |     |
|--------------|---------------------------------------------------------------|-----|
| Einvaldens   | -----MSKKKVELEDVYVKLSHKEQILTRPDYIGSVEKNDES                    | 38  |
| Emoshkovskii | -----MSKKGAGKAELEDIYVKLTHKEQILTRPDYIGSVEKNDEE                 | 41  |
| Edispar      | -----                                                         | 0   |
| Ehistolytica | -----MSKEKEKLEDIYVKLSHKEQILTRPDYIGSVERNDEQ                    | 38  |
| Enuttalli    | -----MSKEKEKLEDIYVKLSHKEQILTRPDYIGSVERNDEQ                    | 38  |
| Scerevisiae  | -----MSTEPVSASDKYQKISQLEHILKRPDYIGSVETQEQL                    | 38  |
| Hsapiens     | MEVSPLQPVENMQVNIKKKNEDAKKRLSVERIYQKKTQLEHILLRPDYIGSVELVTQQ    | 60  |
| Einvaldens   | VISVYNNKGKGIPIEIHKKEKMYIPELIFGHLLTSSNYRDDDKKVTGGRNGYGAKLANIFS | 153 |
| Emoshkovskii | TISIYNNKGKGIPIEIHKKEQIYIPELIFGHLLTSSNYKDDDKKVTGGRNGYGAKLANIFS | 159 |
| Edispar      | SITVYNNKGKGIPIEIHKKENIYIPELIFGHLLTSSNYKDDDKKVTGGRNGYGAKLANIFS | 76  |
| Ehistolytica | SITVYNNKGKGIPIEIHKKEHIYIPELIFGHLLTSSNYKDDDKKVTGGRNGYGAKLANIFS | 156 |
| Enuttalli    | SITVYNNKGKGIPIEIHKKEHIYIPELIFGHLLTSSNYKDDDKKVTGGRNGYGAKLANIFS | 156 |
| Scerevisiae  | TIEVKNDGKGIPIEIHKNENIYIPEMIFGHLLTSSNYDDDEKKVTGGRNGYGAKLCNIFS  | 153 |
| Hsapiens     | LISIWNNKGKIPVVEHKVEKMYVPALIFGQLLTSSNYDDDEKKVTGGRNGYGAKLCNIFS  | 174 |
|              | * : *:****: * : *::*: * :***:***** **:*****_****              |     |
| Einvaldens   | KKNKKGAEIKPFQVKNHLFVVRCLINPAFDSQTKETLKTQSSKFGSKPVLSDKFFTKL    | 371 |
| Emoshkovskii | KLNNKKGAEIKPFQVKNHLFVFNLSLIENPAFDSQTKETLKTQSGKFGSKPVLSDSFFKQL | 378 |
| Edispar      | KLNNKKGAEIKPFQIKNHLFVFNLSLIENPAFDSQTKETLKTQVNFSGSKPTLSDKFFKEL | 295 |
| Ehistolytica | KLNNKKGAEIKPFQIKNHLFVFNLSLIENPAFDSQTKETLKTQVNFSGSKPSLSDKFFKEL | 375 |
| Enuttalli    | KLNNKKGAEIKPFQIKNHLFVFNLSLIENPAFDSQTKETLKTQVNFSGSKPSLSDKFFKEL | 375 |
| Scerevisiae  | KKKKK--SVKSFQIKNNMFIINCLINPAFTSQTKEQLTTRVKDFGSRCEIPLYINKI     | 391 |
| Hsapiens     | KKNKGGVAVKAHQVKNHMFVFNALINPTFDSQTKENMTLQPKSFGSTCQLSEKFIKAA    | 402 |

261

262 **Fig 10. Prediction of ICRF-193 binding motif on *Entamoeba* Topo II.** Multiple Sequence Alignment of  
 263 hTopoIIa and ScTopoII with the ortholog in different *Entamoeba* species showing the residues involved in the  
 264 interaction with bizdioxopiperazine derivatives like ICRF-193, in eukaryotic Topo II (highlighted blue). The  
 265 His<sub>41</sub> involved in the drug binding pocket of hTopoIIa is substituted with Gln<sub>20</sub> in the EhTopo II. Substitution of  
 His with Gln in the drug binding pocket was conserved in different species of *Entamoeba* (marked with red  
 arrow) [33,34]

## 266 2.7. Susceptibility of *E. histolytica* to fluoroquinolones targeting prokaryotic Topo IIA

267 Drugs that target prokaryotic topoisomerase II like DNA gyrases and Topoisomerase IV are  
 268 primarily fluoroquinolone derivatives. Ciprofloxacin and clinafloxacin are new generation  
 269 fluoroquinolones with a broad spectrum of antibacterial activity. However, these drugs have a  
 270 much lower potency against eukaryotic topoisomerase II. Interestingly, both of these drugs were  
 271 toxic to the survival of *Eh* with an effect comparable to that of etoposide (Fig 11). Further,  
 272 ciprofloxacin has a profound, direct inhibitory effect on the enzymatic activity of native EhTopo  
 273 II in comparison to etoposide, affecting the enzyme at a much lower concentration than that of  
 274 the latter (Fig 12). It is also interesting to note that ciprofloxacin has much lower EC<sub>50</sub> against *Eh*  
 275 in comparison to that reported in mammalian cell line [35, 36]. Like in case of *Eh*, ciprofloxacin

276 can reduce the viability of *Ei* and also decrease the encystation efficiency (Fig 13). This opens up  
 277 scope to further explore newer and better fluoroquinolones in the light of an anti-amoebic drug  
 278 against this parasite (Table 1).

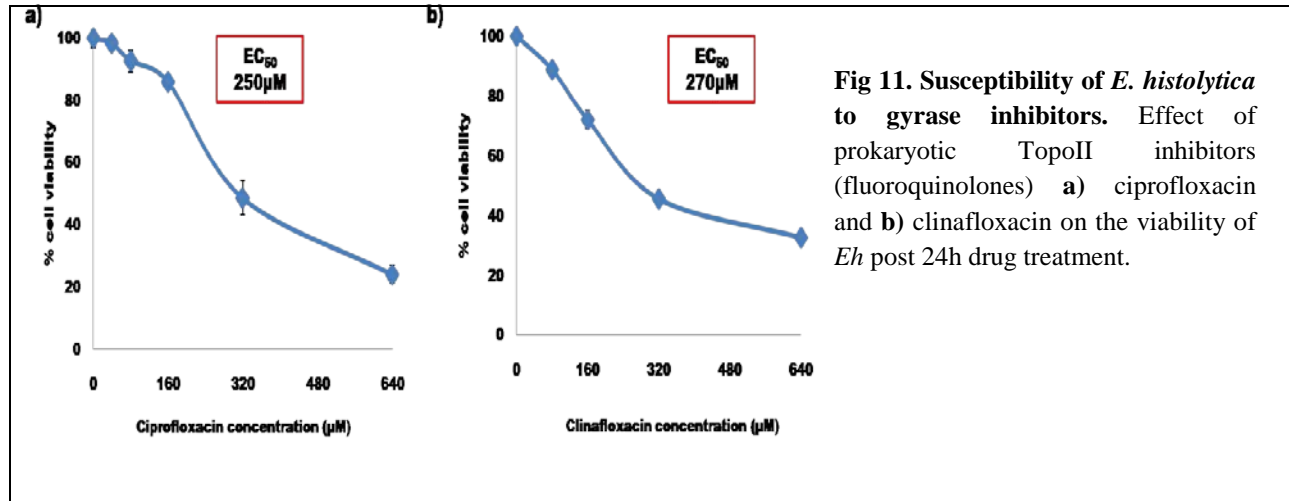

279  
 280

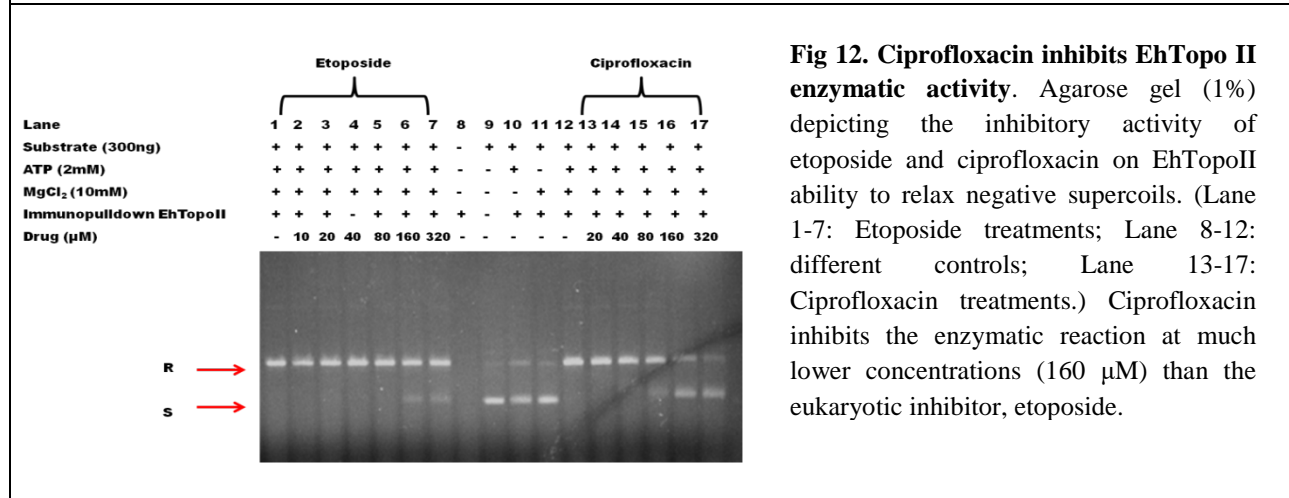

281  
 282

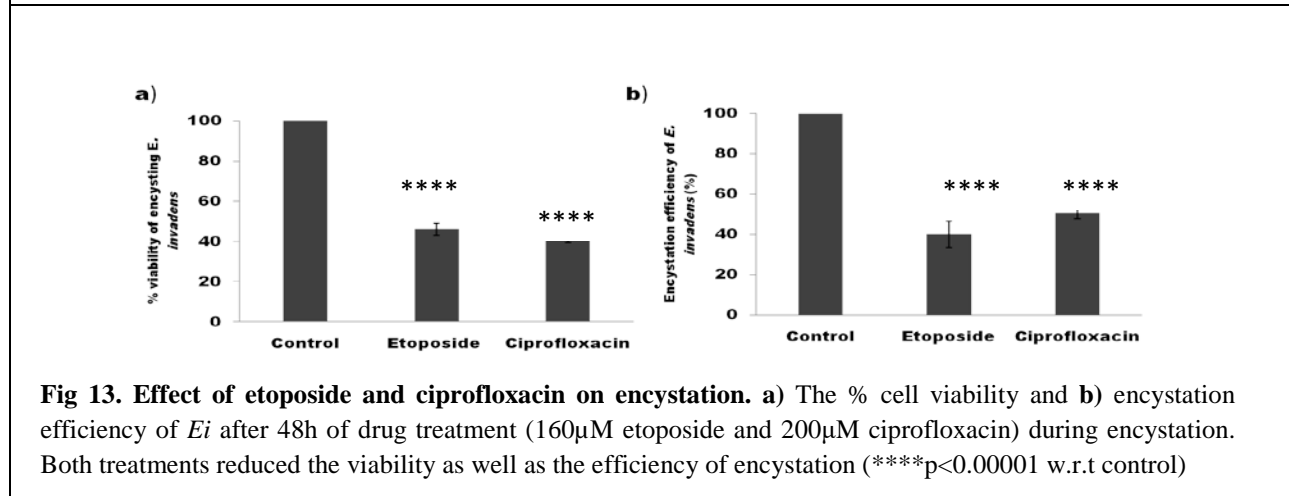

283  
 284

285 **Table 1.** Comparison of EC<sub>50</sub> of various TopoII inhibitors against *Eh* to that of mammalian cell  
lines. (N/D: Not determined)

286

287

288

289

290

291

292

293

| <b>Inhibitor</b>     | <b>EC<sub>50</sub><br/><i>E. histolytica</i></b> | <b>EC<sub>50</sub> Mammalian cell line</b> |
|----------------------|--------------------------------------------------|--------------------------------------------|
| <b>Etoposide</b>     | 200μM                                            | 40-80μM <sup>37,38</sup>                   |
| <b>ICRF 193</b>      | 15μM                                             | 2-5 μM <sup>39</sup>                       |
| <b>Amsacrine</b>     | 80μM                                             | 20-30μM <sup>40</sup>                      |
| <b>Ciprofloxacin</b> | 250μM                                            | 1740μM <sup>35,36</sup>                    |
| <b>Clinafloxacin</b> | 270μM                                            | N/D                                        |

### 294 **3. Discussion**

295 Topoisomerases, being a crucial player in all DNA processes, is often involved in the stress  
296 response and survival of all organisms across the biological world [41, 42]. Like all other  
297 organisms, *E. histolytica* also has a pool of genes coding for various types of topoisomerases.  
298 The bioinformatic analysis shows that the putative topoisomerases of *E. histolytica* resembled  
299 Topo III $\alpha$ , Topo III $\beta$ , Topo II, and SPO11 and are very closely related to their orthologs in *E.*  
300 *invadens*. Although all topoisomerases genes were eukaryotic, (Phylogenetic analysis)  
301 recognizable eukaryotic Topo I could not be identified in *Entamoeba*. Among these genes, we  
302 observe that topoisomerase II is crucial not only for normal growth and proliferation of the  
303 trophozoites but appears to be the most important for the parasites' response to various stress  
304 conditions like heat shock as well as oxidative stress. Similar levels of upregulation of  
305 topoisomerase II under these stress conditions are a reported phenomenon in human cancer cells  
306 and mediate the excision of chromosomal DNA loops into High Molecular weight (HMW)  
307 fragments as a stress response signal under oxidative stress [43, 44].

308 Stress is one of the most important environmental signals for encystation in *Entamoeba*, leading  
309 to the formation of environmentally resistant cysts. As a response to energy deficient  
310 environment during glucose starvation and early encystation, trophozoites switch from an  
311 actively proliferating stage to a dormant form during which many genes involved in the  
312 metabolism and proliferation are downregulated. Likewise, we show that Topoisomerase II, a  
313 proliferation marker, also faces a steady decline in the early periods of encystation in  
314 *Entamoeba*. Similar stage-specific expression of topoisomerase II has been observed in other  
315 parasites as well. For example, in *P. falciparum* the ring stage has a relatively lower level of the  
316 protein expression in comparison to trophozoite and schizont stage [18] while in *Leishmania*

317 *infantum* expression levels varied considerably between infective intracellular amastigotes,  
318 proliferative and non-proliferative stages of promastigotes [45]. However, we report that, with  
319 the progression of encystation, transcription and translation of topoisomerase II is upregulated in  
320 *Entamoeba* around the period of tetranuclear formation, which is one of the key phenomena in a  
321 maturing cyst. Further, during this stage of encystation, the enzyme colocalizes on the newly  
322 forming nuclei in *E. invadens* suggesting that it may be necessary to remove the topological  
323 strains that occur in the DNA during this nuclear event. Also, the significant drop in viability and  
324 encystation efficiency upon its downregulation suggests that *Entamoeba* topoisomerase II is  
325 indeed important for the proper stage conversion of this parasite.

326 Over the years, topoisomerase II has emerged as a good drug target and consequently led to the  
327 development of an extensive array of medicines as anti-cancer and anti-bacterial agents. As  
328 already mentioned, it is extensively explored as a potential drug target in many other parasites as  
329 well. We showed that *E. histolytica* has a lower susceptibility to eukaryotic topoisomerase  
330 targeting drugs, especially etoposide while fluoroquinolones that target prokaryotic gyrases and  
331 topoisomerase IV were significantly toxic to the enzyme activity as well as parasite viability.  
332 Sequence analysis of EhTopo II with human TopoII $\alpha$  show that specific key residues involved in  
333 the drug interaction with etoposide and ICRF 193 are naturally substituted in *Eh* and this may be  
334 a contributing factor to the poor performance of these drugs towards the parasite in comparison  
335 to mammalian cells. So it may be concluded that the eukaryotic TopoII acquired mutation during  
336 the evolution that makes it etoposide susceptible. On the other hand, gyrase inhibitors like  
337 fluoroquinolones have reported lower potency against higher eukaryotes, including humans [46].  
338 Chemical modifications to the side chains of fluoroquinolones have shown to enhance or  
339 decrease its potency towards different organisms [47, 48]. Similar susceptibility to

340 fluoroquinolones, in comparison to mammalian cells, is also reported in case of other parasites  
341 like *P. falciparum* and *L. donovani* and is being explored as a drug target as well [18-21].  
342 Another bacterial gyrase inhibitor GSK299423 (a piperidinylalkylquinoline) has been reported to  
343 be extremely effective against *P. falciparum* with 100 times higher potency than against  
344 mammalian cell lines [49]. In addition, computational design of newer fluoroquinolones with  
345 enhanced potency against parasitic topoisomerase is already gaining traction and thus opens up  
346 possibilities for better anti-parasitic drugs [50, 51]. Hence, high potency of fluoroquinolones to  
347 *E. histolytica*, low toxicity towards human cells and ease of chemical modification in its side  
348 chains are advantages for designing these drugs to specifically target EhTopo II.  
349 Limited treatment methods and potential drug resistance have accelerated the need for newer  
350 therapies to tackle amoebiasis. The topoisomerase II of *Eh* is crucial for the stress response and  
351 formation of mature cysts and shares only 45% identity with the human counterpart. As we  
352 already show that ciprofloxacin is toxic not only to the proliferating trophozoite stage but also  
353 severely reduces encystation, designing newer variations of fluoroquinolones that can  
354 specifically target *E. histolytica* with minimum side effects to the host could be the answer to not  
355 only treat the disease but also prevent the host-to-host transmission of amoebiasis.  
356

357 **4. Materials and Methods:**

358 **4.1. In silico analysis:**

359 **4.1.1. Multiple sequence analysis:**

360 Genes annotated as putative topoisomerases from *Eh* and *Ei* were identified from AmoebaDB.  
361 Protein sequences of topoisomerases from different organisms were retrieved from the UniProt  
362 database (<http://www.uniprot.org/>) and were aligned with putative topoisomerases of *Entamoeba*  
363 using ClustalOmega (<http://www.ebi.ac.uk/>).

364 **4.1.2. Phylogenetic tree construction:**

365 Phylogenetic analysis was performed to understand the categories of topoisomerases the seven in  
366 *Entamoeba* fall into. Protein sequence from 50 different topoisomerases covering all known  
367 categories, belonging to a range of prokaryotic and eukaryotic organisms like bacteria, fungi,  
368 protozoa, plant, and animals were retrieved using UniProt database and aligned with the putative  
369 topoisomerases of *Eh* and *Ei* using Clustal W. Using this alignment, phylogenetic tree was  
370 constructed with MEGA 7 [52] software by the Maximum Likelihood method and evolutionary  
371 distance between sequence pairs was analyzed by the WAG model. Reliability of the model was  
372 assessed by bootstrapping with 1000 iterations.

373 **4.1.3. Conserved domain identification and analysis:**

374 Conserved motifs on putative *Entamoeba* topoisomerases were identified using MEME software  
375 and further analyzed using NCBI-CDS (<http://www.ncbi.nlm.nih.gov/Structure/cdd/wrpsb.cgi>)  
376 [53], and nuclear localization sequences (NLS) was predicted using cNLS mapper ([http://nls-](http://nls-mapper.iab.keio.ac.jp/cgi-bin/NLS_Mapper_form.cgi)  
377 [mapper.iab.keio.ac.jp/cgi-bin/NLS\\_Mapper\\_form.cgi](http://nls-mapper.iab.keio.ac.jp/cgi-bin/NLS_Mapper_form.cgi)) [54].

378

379



380 **4.2. Growth, stress induction, and encystation of *Entamoeba*:**

381 Trophozoites of *E. histolytica* strain HM-1:1MSS and *E. invadens* IP-1 were grown at 37 °C and  
382 25 °C respectively in Trypticase-Yeast Extract-Iron-Serum (TYI-S-33) medium containing 10%  
383 heat-inactivated adult bovine serum, 125µl/100ml streptomycin-penicillin G and 3% vitamin mix  
384 [55,56]. As in vitro encystation of *Eh* is not feasible yet, *Ei* is used as the model organism for the  
385 same. Late log phase cells were chilled to detach and harvested by centrifugation at 1500rpm for  
386 5min at 4°C.  $5 \times 10^5$  cells/ml were transferred to 47% Low Glucose (LG) medium (TYI without  
387 glucose diluted 2.12 times with water, 2% heat inactivated adult bovine serum, 2.5% vitamin  
388 mix, 125µL/100ml antibiotic). Cysts cultured in LG medium were collected after 12, 24, 36, and  
389 48h.

390 Cells were subjected to glucose starvation by overnight incubation in TYI-S-33 media devoid of  
391 glucose. Trophozoites of *Eh* and *Ei* were incubated at 42°C and 37°C respectively for 1hr for  
392 heat shock. Oxidative stress was induced by incubating the cells in media containing 1.0mM of  
393 H<sub>2</sub>O<sub>2</sub> for one hour [57, 58].

394 **4.3. RNA isolation, cDNA synthesis, and real-time RT-PCR:**

395 The total RNA was isolated using Trizol reagent (Ambion, USA) following standard protocol.  
396 The RNA quantity was measured using a NanoDrop spectrophotometer. The isolated RNA were  
397 treated with DNase I (Fermentas, USA) at 37°C for 1hr followed by enzyme inactivation at 60°C  
398 for 5 min. Genomic DNA contamination was checked by PCR amplification without RT, of actin  
399 or ARF gene. Total RNA and genomic DNA were used as template for negative and positive  
400 control, respectively.

401 The cDNA was synthesized from 2µg of purified RNA template in 20 µl reaction volume using  
402 OligodT by First Strand cDNA synthesis kit (BioBharati, India) at 42°C for 50 min. The enzyme

403 was deactivated by incubating at 70°C for 15 min. Real-time RT-PCR was carried out following  
404 our previously reported standard protocol in Eppendorf Master Cycler RealPlex, using 200ng  
405 cDNA, 0.3µM gene specific primers (S1 Table) and PowerUp™ SYBR Green Master Mix  
406 (Thermo Fischer Scientific, USA). The fold change of transcript expression was calculated using  
407 the  $\Delta\Delta C_T$  method with respect to housekeeping genes like ADP-ribosylation factor (ARF) or  
408 actin. The specificity of the amplicon was validated through melting curve analysis.

#### 409 **4.4. Cloning, expression, and purification of truncated EhTopo II**

##### 410 **4.4.1. Cloning of *EhTopoII* fragment into a bacterial expression system**

411 Despite using several combinations of vector-strain bacterial expression systems, the full length  
412 (4050bp) expression of putative EhTopoII (EHI\_120640) was not successful. Hence, a 1127bp  
413 long fragment (from 760bp-1887bp) containing no tandem repeats of rare codons was PCR  
414 amplified from *Eh* genomic DNA with the specific primers EhTopoIIfgSBamHI and  
415 EhTopoIIfgASXhoI (S1 Table) using High Fidelity Taq polymerase (Thermo Fischer Scientific,  
416 USA) and subcloned into pGEMT-Easy (Promega, USA) via TA ligation. This 1127bp fragment  
417 shared 77% DNA sequence identity with the ortholog in *Ei* (EIN\_145900) with no gaps and  
418 carried regions of the putative catalytic site. Positive clones identified by blue-white screening  
419 and confirmed by *BamHI-XhoI* double digestion were sequenced and further cloned into the  
420 pET21a expression vector. Restriction digestion was done for clone confirmation, and  
421 recombinant vector was transformed into *E. coli* BL21 (DE3) expression strain.

##### 422 **4.4.2. Expression and purification of recombinant truncated EhTopo II protein**

423 Overnight cultures of *E. coli* BL21(DE3) strain carrying recombinant pET21a vectors were  
424 diluted to OD<sub>600</sub> 0.05 and grown at 37°C till the OD<sub>600</sub> was 0.6-0.8 at which recombinant protein  
425 expression was induced using 1mM IPTG for 4 hours at 37°C. The recombinant protein was

426 solubilized using 0.25% S-lauryl sarcosine and further purified using Ni-NTA affinity  
427 chromatography. The purified recombinant protein fragment was resolved on 12% SDS-PAGE.

#### 428 **4.5. Generation and purification of Anti-EhTopo II polyclonal antibody**

429 Polyclonal antibody against recombinant EhTopo II fragment was commercially raised in rabbits  
430 (Abgenex, India) and purified from the crude sera using Protein-A sepharose (Invitrogen, USA)  
431 affinity chromatography. The sera were loaded over a pre-equilibrated Protein-A sepharose  
432 column following 1:1 v/v dilution in PBS (pH 8). After sufficient washing to remove all unbound  
433 proteins, the antibody was eluted using 100mM glycine (pH 2.8), and at least 20 fractions of  
434 1mL each were collected into tubes containing 100 $\mu$ L of 1M Tris (pH 9). The absorbance of the  
435 fractions at 280nm was measured, and the antibody-containing samples were pooled, dialyzed  
436 over several changes of 1x PBS and concentrated.

#### 437 **4.6. Total protein extraction from *Entamoeba***

438 The *Entamoeba* cells grown at different conditions were harvested, washed with 1x PBS and  
439 resuspended in lysis buffer containing 20mM Tris (pH 7.5), 1mM EDTA, 200mM NaCl, 1mM  
440 PMSF, 1 $\mu$ g/mL of leupeptin and pepstatin, 0.3 $\mu$ M of aprotinin, 15 $\mu$ M E-64, 1% Triton-X and  
441 0.1% SDS and incubated for 30mins. The samples were then sonicated, centrifuged for 10mins at  
442 10,000 rpm at 4°C, and the supernatant was collected for further experiments. This method was  
443 followed for samples from all conditions, including different kinds of stress and different hours  
444 of encystation.

#### 445 **4.7. Western blot analysis**

446 Recombinant as well as native protein samples were run on 12% SDS-PAGE and blotted onto  
447 PVDF membrane at 70V for 2h. The membrane was blocked for 2h using 3% BSA in PBST

448 (0.1% Tween 20 in 1xPBS) and probed with anti-EhTopo II antibody (1:2000) for 2h at 4°C.  
449 Further, it was washed extensively with PBST and incubated with HRP conjugated goat anti-  
450 rabbit IgG antibody (1:5000) for 90min at room temperature. After washing thrice with PBST,  
451 the membrane was developed using Luminata Classico Western HRP substrate (Merck  
452 Millipore, USA) and detected in ImageQuant LAS500 imager (GE Life Science, USA).

### 453 **2.8. Nuclear extract preparation from *Entamoeba***

454 The harvested log phase trophozoites were washed thrice with 1x PBS and resuspended in 5x  
455 volume ice-cold TEMP buffer (10 mM Tris-HCl, pH 7.5, 1 mM EDTA, 4 mM MgCl<sub>2</sub>, 0.5 mM  
456 PMSF), containing 2 µg/ml leupeptin and aprotinin, 1µg/ml pepstatin and µM E-64. After 30  
457 min incubation on ice, the cells are lysed using 0.5% Triton-X treatment for 10 mins. The lysate  
458 is overlaid on a 1.5M sucrose cushion and spun at 12,000xg for 10mins. The pure nuclei pellet so  
459 obtained is resuspended in TEP buffer (10 mM Tris-HCl, pH 7.5, 1 mM EDTA, 0.5 mM PMSF)  
460 containing 0.35M NaCl and all protease inhibitors and incubated on ice for 45 mins followed by  
461 centrifugation at 12,000xg for 15 min. The supernatant is the nuclear extract which was assayed  
462 for topoisomerase II activity.

### 463 **4.9. Immunoprecipitation of native Topoisomerase II**

464 Functional characterization of *Entamoeba* Topoisomerase II was carried out by  
465 immunoprecipitation of the protein from crude nuclear extracts of log phase trophozoites using  
466 anti-EhTopo II antibody. The nuclear extract was pre-cleared with pre-immune rabbit IgG (10  
467 µg/ml) and 20 µl of protein-agarose beads (BioBharati, India) 1h at 4°C. The pre-cleared  
468 supernatant was collected by centrifugation and incubated with purified anti-EhTopo II IgG  
469 (10µg/ml) at 4 °C following which, 20 µl of protein-A agarose beads were added to precipitate  
470 the antigen-antibody complex and incubated at 4°C for 2h. Agarose beads with bound immune

471 complexes were then harvested by centrifugation at 4°C and washed with nuclear extract buffer.  
472 The immunoprecipitated topoisomerase II was confirmed by Western blotting and used for  
473 further assays.

#### 474 **4.10. Topoisomerase II assay**

475 The relaxation assay was carried out according to the protocol reported by Chakraborty and  
476 Majumder, 1987 [59]. The standard relaxation assay mixture contained: 25mM Tris-HCl, pH  
477 7.5, 10mM MgCl<sub>2</sub>, 0.1mM EDTA, 1mM DTT, 2mM ATP, 50mM NaCl, 10% glycerol, 500ng of  
478 supercoiled pure pL4440 plasmid substrate and different concentrations of nuclear extract or  
479 immunoprecipitated protein solution as enzyme source. The reactions were carried out for 30min  
480 at 25°C and 37°C for extracts from *Ei* and *Eh* respectively and arrested by adding dye containing  
481 1% SDS and 10mM EDTA. The samples were electrophorized on 1% agarose gel at 1V/cm  
482 overnight at room temperature and stained with ethidium bromide.

#### 483 **4.11. Staining and confocal microscopy**

484 *Entamoeba* cells were harvested, washed with PBS (pH 7.6) and fixed with 2% p-formaldehyde  
485 for 30mins at room temperature. The fixed cells were washed thoroughly and permeabilized with  
486 0.1% Triton-X for 5mins blocked for 1h with 3% BSA and incubated overnight at 4°C with anti-  
487 EhTopo II antibody (1:100) in 1xPBS containing 1% BSA. It was followed with further washes  
488 and incubation at room temperature with TRITC conjugated anti-rabbit IgG (1:400) (Sigma,  
489 USA) for 1h. The nucleus was stained using 10µg/mL DAPI. The stained cells were visualized  
490 and analyzed using Olympus FluoView FV1000 confocal microscope and software.

491

492

493

#### 494 **4.12. dsRNA mediated RNA interference studies**

##### 495 **4.12.1. Cloning and expression of *EhTopoII* and *EiTopoII* specific dsRNA**

496 In order to achieve downregulation at the RNA level, a 300bp and 250bp fragment within  
497 *EhTopoII* and *EiTopoII*, respectively were selected as targets for RNA interference. Specificity  
498 of the dsRNA was ensured by the selected regions within *Entamoeba TopoII* that did not contain  
499 19mer homology to any other genes in *Eh* and *Ei*. These regions were amplified using specific  
500 primers *EiTopoIId*sFHindIII-*EiTopoIId*sRXhoI and *EhTopoIId*sFXbaI-*EhTopoIId*sRXhoI (S1  
501 Table), subcloned into pGEMT-Easy TA vector and then into expression vector pL4440, a gift  
502 from Andrew Fire (Addgene) (<http://n2t.net/addgene:1654>) which is flanked by T7 promoter on  
503 either side of its MCS. Recombinant plasmids carrying the inserts were transformed into the  
504 RNase III-deficient, *E. coli* HT115 cells. The dsRNA expression was induced by 1mM IPTG  
505 when OD<sub>600</sub> reached 0.6, followed by incubation at 37°C for 4h.

##### 506 **4.12.2. Extraction and purification of dsRNA**

507 The gene specific dsRNA was extracted using water saturated phenol: chloroform: isoamyl  
508 alcohol (25:24:1) followed by phase separation at high speed centrifugation. The RNA from the  
509 aqueous layer was precipitated with equal volumes of isopropanol, further washed with 70%  
510 ethanol, air dried and resuspended in nuclease-free water. Single-stranded RNA and DNA  
511 contaminants were eliminated by treating the sample with 0.2µg/µL RNaseA (Sigma, USA) and  
512 0.1U/µL DNase (Thermo Fischer Scientific, USA) for 1h at 37°C. The samples were further  
513 purified using Trizol, following standard protocol. The dsRNA from a 150 bp region in the  
514 flavin mononucleotide based fluorescence protein of *B.subtilis* (BS1), with no sequence  
515 similarity to *Entamoeba* genome, was used as negative control dsRNA.

##### 516 **4.12.3. dsRNA mediated downregulation of *Entamoeba* by soaking**

517 *Eh* and *Ei* trophozoites were incubated in TYI or LG media containing 200 µg/ml of the  
518 respective, purified TopoII-specific dsRNA for various time points, based on the experiment, and  
519 the silencing efficiency was calculated using real-time RT-PCR [29]. All RNAi studies were  
520 carried out with two controls: one without dsRNA and one with non-specific dsRNA (from *B.*  
521 *subtilis*, as mentioned above).

#### 522 **4.13. Determination of cell viability and encystation efficiency**

523 Effect of *Entamoeba Topo II* silencing and potency of various topoisomerase II drugs was  
524 studied by assessing their effect on viability. Cell viability was determined by trypan blue dye  
525 exclusion assay. Harvested cells, following various treatments, are resuspended in 1x PBS and  
526 mixed with equal volumes of 0.4% trypan blue (Himedia, India). Dead cells take up the dye and  
527 appear blue, while live ones remain white. The cell count is calculated at the start of the  
528 experiment as well as following dye treatment, using a Neubauer hemocytometer.

529 After 48h of encystation, the total cell number (cyst+trophozoite) was calculated, and the  
530 harvested cells were treated with 0.5% sarcosine for 10mins to lyze the trophozoites. The number  
531 of cysts was then calculated and the encystation efficiency is represented as (cyst x  
532 100)/(cyst+trophozoite).

#### 533 **4.14. Structure modeling and analysis**

534 The three-dimensional protein structure of EhTopo II was predicted by homology modeling  
535 using SWISS-Model server (<https://swissmodel.expasy.org/>). The template structure was  
536 obtained from PDB based on sequence similarity and, refined using ModRefiner server  
537 (<http://zhanglab.ccmb.med.umich.edu/ModRefiner/>). The generated structure was validated by  
538 the Ramachandran plot using PROCHECK. PyMol software was used for the visualization of the  
539 protein structure.

540 **Acknowledgement**

541 SKG would like to thank DBT, Govt. of India for partial funding of this project. The authors  
542 thank Indian Institute of Technology Kharagpur for the research facilities and Fellowship to  
543 SSV. The authors like to acknowledge FIST, DST, Govt. of India for the confocal facility. The  
544 *E. coli* HT115 (DE3) strain was a kind gift from the Caenorhabditis Genetics Centre, funded by  
545 the NIH National Centre for Research Resources, USA.

546



547 **Reference:**

- 548 1. McConnachie EW (1969) The morphology formation and development of cysts of  
549 *Entamoeba*. *Parasitol.* 59, 41-53.
- 550 2. Avron B, Stolarsky T, Chayen A & Mirelman D (1986) Encystation of *Entamoeba*  
551 *invadens* IP\_1 is induced by lowering the osmotic pressure and depletion of nutrients from  
552 the medium. *J Parasitol.* 33, 522–525.
- 553 3. Sanchez LB, Enea V & Eichinger D (1994) Identification of a developmentally regulated  
554 transcript expressed during encystation of *Entamoeba invadens*. *Mol Biochem Parasitol.*  
555 67, 125-135.
- 556 4. Samanta SK, Varghese SS, Krishnan D, Baidya M, Nayak D, Mukherjee S & Ghosh SK  
557 (2018) A novel encystation specific protein kinase regulates chitin synthesis in *Entamoeba*  
558 *invadens*. *Mol Biochem Parasitol.* 220, 19-27.
- 559 5. Singh T, Agarwal T & Ghosh SK (2018) Identification and functional analysis of a stress-  
560 responsive MAPK15 in *Entamoeba invadens*. *Mol Biochem Parasitol.* 222, 34-44.
- 561 6. Sirijintakam P and Bailey GB (1980) The relationship of DNA synthesis and cell cycle  
562 events to encystation by *Entamoeba invadens*. *Arch Invest Med.* 11(1), 3-10.
- 563 7. Silberman JD, Clark CG, Diamond LS & Sogin ML (1999) Phylogeny of the genera  
564 *Entamoeba* and *Endolimax* as deduced from small-subunit ribosomal RNA sequences. *Mol*  
565 *Biol Evol.* 16, 1740-1751.
- 566 8. Sehgal D, Mittal V, Ramachandran S, Dhar SK, Bhattacharya A & Bhattacharya S (1994)  
567 Nucleotide sequence organization and analysis of the nuclear ribosomal DNA circle of the  
568 protozoan parasite *Entamoeba histolytica*. *Mol Biochem Parasitol.* 67(2), 205-214.

- 569 9. López-Casamichana M, Orozco E, Marchat LA & López-Camarillo C (2008) Transcriptional  
570 profile of the homologous recombination machinery and characterization of the EhRAD51  
571 recombinase in response to DNA damage in *Entamoeba histolytica*. *BMC Mol Biol.* 9, 35.
- 572 10. Singh N, Bhattacharya S & Paul J (2011) *Entamoeba invadens*: dynamics of DNA synthesis  
573 during differentiation from trophozoite to cyst. *Exp Parasitol.* 127(2), 329-333.
- 574 11. Krishnan D & Ghosh SK (2018) Cellular events of multinucleated giant cells formation  
575 during the encystation of *Entamoeba invadens*. *Front Cell Infect Microbiol.* 8, 262.
- 576 12. Champoux JJ (1998) Domains of Topoisomerase I and associated functions. *Prog Nucleic*  
577 *Acid Res* 60, 111-132.
- 578 13. Nitiss JL (2009) DNA topoisomerase II and its growing repertoire of biological functions.  
579 *Nat Rev Cancer.* 9, 327-337.
- 580 14. Topcu Z (2001) DNA topoisomerases as targets for anticancer drugs. *J Clin Pharm Ther.* 26,  
581 405-411.
- 582 15. Pouquier P & Pommier Y (2010) Topoisomerase I mediated DNA damages. *Adv Cancer Res.*  
583 80, 189-216.
- 584 16. Hasinoff BB, Wu X, Patel D, Kanagasabai R, Karmahapatra S & Yalowich JC (2016)  
585 Mechanisms of the reduced cardiotoxicity of Pixantrone. *J Pharmacol Exp Ther.* 356(2), 397-  
586 409.
- 587 17. Janockova J, Korabecny J, Plsikova J, Babkova K, Konkolova E, Kucerova D et al (2019) *In*  
588 *vitro* investigating of anticancer activity of new 7-MEOTA-tacrine heterodimers.  
589 *J Enzyme Inhib Med Chem.* 34(1), 877-897.

- 590 18. Cheesman S, Horrocks P, Tosh K & Kilbey B (1998) Intraerythrocytic expression of  
591 topoisomerase II from *Plasmodium falciparum* is developmentally regulated. *Mol Biochem*  
592 *Parasitol.* 92, 39-46.
- 593 19. Majumder HK, Sengupta T, Dasgupta A & Das A (2004) Topoisomerases of kinetoplastid  
594 parasites as potential chemotherapeutic targets. *Trends Parasitol.* 20(8), 381-387.
- 595 20. Chowdhury SR, Kumar A, Godinho JP, Silva ST, Zuma AA, Majumder HK. et al (2017)  
596 Voacamine alters *Leishmania* ultrastructure and kills parasite by poisoning unusual bi-  
597 subunit topoisomerase IB. *Biochem Pharmacol.* 138, 19-30.
- 598 21. Chowdhury SR & Majumder HK (2019) DNA topoisomerases in unicellular pathogens:  
599 structure, function and druggability. *Trends Biochem Sci.* 44(5), 415-432.
- 600 22. Freeman CD, Klutman NE & Lamp KC (1997) Metronidazole A therapeutic review and  
601 update. *Drugs.* 54, 679-708.
- 602 23. Teimey LM, McPhee SJ & Papadakis MA (1999) Current medical diagnosis and treatment.  
603 Appleton & Lange, Stamford, Conn.
- 604 24. Samarawickrema NA, Brown DM, Upcroft JA, Thammapalerd N & Upcroft P (1997)  
605 Involvement of superoxide dismutase and pyruvate: ferredoxin oxidoreductase in  
606 mechanisms of metronidazole resistance in *Entamoeba histolytica*. *J Antimicrob*  
607 *Chemother.* 40, 833–840.
- 608 25. Wassmann C, Hellberg A, Tannich E & Bruchhaus I (1999) Metronidazole resistance in  
609 the protozoan parasite *Entamoeba histolytica* is associated with increased expression of  
610 iron-containing superoxide dismutase and peroxiredoxin and decreased expression of  
611 ferredoxin 1 and flavin reductase. *J Biol Chem.* 274, 26051–26056.

- 612 26. Dingsdag SA & Hunter N (2017) Metronidazole: an update on metabolism, structure-  
613 cytotoxicity and resistance mechanisms. *J Antimicrob Chemother.* 73, 265-279.
- 614 27. Goolsby TA, Jakeman B & Gaynes RP (2017) Clinical relevance of metronidazole and  
615 peripheral neuropathy: a systematic review of the literature. *Int J Antimicrob Agents.* 51, 319-  
616 325.
- 617 28. Jeelani G, Sato D, Husain A, Cadiz AE & Sugimoto M (2012) Metabolic profiling of the  
618 protozoan parasite *Entamoeba invadens* revealed activation of unpredicted pathway during  
619 encystation. *PLoS ONE.* 7(5), e37740.
- 620 29. Samanta SK & Ghosh SK (2012) The chitin biosynthesis pathway in *Entamoeba* and the role  
621 of glucosamine-6-P isomerase by RNA interference. *Mol Biochem Parasitol* 186(1), 60-68.
- 622 30. Wu CC, Li TK, Farh L, Lin LY, Lin TS & Yu YJ (2011) Structural Basis of Type II  
623 Topoisomerase Inhibition by the Anticancer Drug Etoposide. *Science.* 333 (6041), 459-462.
- 624 31. Bax BD, Chan PF, Eggleston DS, Fosberry A & Gentry DR (2010) Type IIA  
625 topoisomerase inhibition by a new class of antibacterial agents. *Nature.* 466, 935.
- 626 32. Meresse P, Dechaux E, Monneret C & Bertounesque E (2004) Etoposide: Discovery and  
627 medicinal chemistry. *Curr Med Chem.* 11, 2443.
- 628 33. Patel S, Jazrawi E, Creighton AM, Austin CA & Fisher LM (2000) Probing the interaction  
629 of the cytotoxic bisdioxopiperazine ICRF-193 with the closed enzyme clamp of human  
630 topoisomerase II $\alpha$ . *Mol Pharmacol.* 58, 560-8.
- 631 34. Classen S, Olland S & Berger JM (2003) Structure of the topoisomerase II ATPase region  
632 and its mechanism of inhibition by the chemotherapeutic agent ICRF-187. *Proc Natl Acad*  
633 *Sci.* 100(19), 10629-10634.

- 634 35. Mahmoudi N, Ciceron L, Franetich JF, Farhati K, Silvie O, Eling W, et al (2003) *In vitro*  
635 activities of 25 quinolones and fluoroquinolones against liver and blood stage *Plasmodium*  
636 spp. *Antimicrob Agents Chemother.* 47, 2636–2639.
- 637 36. Nenortas E, Kulikowicz T, Burri C & Shapiro TA (2003) Antitrypanosomal activities of  
638 fluoroquinolones with pyrrolidinyl substitutions. *Antimicrob Agents Chemother.* 47, 3015–  
639 3017.
- 640 37. Yang X, Sladek TL, Liu X, Butler BR, Froelich CJ & Thor AD (2001) Reconstitution of  
641 Caspase 3 Sensitizes MCF-7 Breast Cancer Cells to Doxorubicin- and Etoposide-induced  
642 Apoptosis. *Cancer Res.* 61(1), 348-354.
- 643 38. Jiang H, Geng D, Liu H, Li Z & Cao J (2016) Co-delivery of etoposide and curcumin by  
644 lipid nanoparticulate drug delivery system for the treatment of gastric tumors. *Drug Deliv.*  
645 23(9), 3665-3673.
- 646 39. Ishida R, Sato M, Narita T, Utsumi KR, Nishimoto T, Morita T et al (1994) Inhibition of  
647 DNA topoisomerase II by ICRF-193 induces polyploidization by uncoupling chromosome  
648 dynamics from other cell cycle events. *J Cell Biol.* 126 (6), 1341-1351.
- 649 40. Arlin Z, Mehta R, Feldman E, Sullivan P & Pucillo A (1987) Amsacrine treatment of patients  
650 with supraventricular arrhythmias and acute leukemia. *Cancer Chemother Pharmacol.* 19,  
651 163.
- 652 41. Ciavarrà RP, Goldman C, Wen KK, Tedeschi B & Castora FJ (1994) Heat stress induces  
653 hsc70/nuclear topoisomerase I complex formation in vivo: evidence for hsc70-mediated,  
654 ATP-independent reactivation in vitro. *Proc Natl Acad Sci USA.* 91, 1751-1755.

- 655 42. Simkova K, Moreau F, Pawlak P, Vriet C, Baruah A, Alexander C et al (2012) Integration of  
656 stress-related and reactive oxygen species-mediated signals by Topoisomerase VI  
657 in *Arabidopsis thaliana*. *Proc Natl Acad Sci. USA*. 109(40), 16360-16365.
- 658 43. Matsuo K, Kohno K, Sato S, Uchiumi T, Tanimura H, Yamada Y et al (1993) Enhanced  
659 expression of the DNA topoisomerase II gene in response to heat shock stress in human  
660 epidermoid cancer KB Cells. *Cancer Res*. 53(5), 1085-1090.
- 661 44. Li TK, Chen AY, Yu C, Mao Y, Wang H & Liu LF (1999) Activation of topoisomerase II-  
662 mediated excision of chromosomal DNA loops during oxidative stress. *Genes Dev*. 13, 1553-  
663 1560.
- 664 45. Hanke T, Ramiro MJ, Trigueros S, Roca J & Larraga V (2003) Cloning, functional analysis  
665 and post-transcriptional regulation of a type II DNA topoisomerase from *Leishmania*  
666 *infantum*. A new potential target for anti-parasite drugs. *Nucleic Acids Res*. 31, 4917-4928.
- 667 46. Fief CA, Hoang KG, Phipps SD, Wallace JL & Deweese JE (2019) Examining the impact of  
668 antimicrobial fluoroquinolones on human DNA topoisomerase II $\alpha$  and II $\beta$ . *ACS Omega*. 4(2),  
669 4049-4055.
- 670 47. Dang Z, Yang Y, Ji R & Zhang S (2007) Synthesis and antibacterial activity of novel  
671 fluoroquinolones containing substituted piperidines. *Bioorg Med Chem Lett*. 17(6), 4523-  
672 4526.
- 673 48. Pokrovskaya V, Belakhov V, Hainrichson M, Yaron S & Baasoy T (2009) Design, synthesis  
674 and evaluation of novel fluoroquinolone-aminoglycoside hybrid antibiotics. *J Med Chem*.  
675 52(8):2243-2254.

- 676 49. Mudeppa DG, Kumar S, Kokkonda S, White J & Rathod PK (2015) Topoisomerase II from  
677 human malaria parasites: expression, purification, and selective inhibition. *J Biol Chem.*  
678 290(33), 20313-20324.
- 679 50. Anquetin G, Greiner J, Mahmoudi N, Santillana-Hayat M, Gonzalles R, Farhati K et al  
680 (2006) Design, synthesis and activity against *Toxoplasma gondii*, *Plasmodium* spp., and  
681 *Mycobacterium tuberculosis* of new 6- fluoroquinolones. *Eur J Med Chem.* 41(12), 1478-  
682 1493.
- 683 51. Zhao X, Zhao Y, Ren Z & Li Y (2019) Combined QSAR/QSPR and molecular docking  
684 study on fluoroquinolones to reduce biological enrichment. *Comput Biol Chem.* 79, 177-  
685 184.
- 686 52. Tamura K, Stecher G, Peterson D, Filipski A & Kumar S (2013) MEGA6: molecular  
687 evolutionary genetics analysis version 6.0. *Mol Biol Evol.* 30(12), 2725–2729.
- 688 53. Marchler-Bauer A & Bryant SH (2004) CD-Search protein domain annotations on the fly.  
689 *Nucleic Acids Res.* 32, W327-W331.
- 690 54. Kosugi S, Hasbe M, Tomita M & Yanagawa H (2009) Systematic identification of yeast cell  
691 cycle-dependent nucleocytoplasmic shuttling proteins by prediction of composite motifs.  
692 *Proc Natl Acad Sci USA.* 106, 10171-10176.
- 693 55. Diamond LS (1961). Axenic cultivation of *Entamoeba histolytica*. *Science.* 134, 336-337.
- 694 56. Diamond LS, Harlow DR & Cunnick CC (1978) A new medium for the axenic cultivation of  
695 *Entamoeba histolytica* and other *Entamoebas*. *Trans R Soc Trop Med Hyg.* 72, 431-432.
- 696 57. Field J, Dellen K, Ghosh SK & Samuelson J (2000) Responses of *Entamoeba invadens* to  
697 heat shock and encystation are related. *J Eukaryot Microbiol.* 47, 511-514.

- 698 58. Tovy A, Hertz R, Siman-Tov R, Syan S, Faust D, Guillen N et al (2011) Glucose starvation  
699 boosts *Entamoeba histolytica* virulence. *PLoS Negl Trop Dis.* 5(8), e1247.
- 700 59. Chakraborty AK & Majumder HK (1987) Decatenation of kinetoplast DNA by an ATP-  
701 dependent DNA topoisomerase from the kinetoplast hemoflagellate *Leishmania donovani*  
702 *Mol Biochem Parasitol.* 26, 215-224.
- 703



704 **Supporting information caption**

705

706 **Tables**

707 S1 Table: List of primers

708 S2 Table: List of putative topoisomerase in *Entamoeba*

709

710 **Figures**

711 S1 Fig: Comparison of FPKM values of different topoisomerases of *E. invadens* during  
712 encystation

713 S2 Fig: Expression and purification of recombinant truncated EhTopo II.

714 S3 Fig: Western blot analysis of native and recombinant Topo II

715 S4 Fig: Cloning and expression of *Entamoeba* Topo II specific dsRNA and dsRNA mediated  
716 silencing of TopoII in *Entamoeba*.
